# Supplementary material for: Extracts Obtained from Pterocarpus angolensis DC and Ziziphus mucronata Exhibit Antiplasmodial Activity and Inhibit Heat Shock Protein 70 (Hsp70) Function
Source: MDPI journal article supplement (doi:10.3390/molecules22081224), 2017-07-28
Supplement: s1 [file s1]

**Supplementary Table 1. The linear range, correlation coefficient, LOD and LOQ of each standard used to quantify the phenolics**

| Standards           | Coefficient of Correlation (R <sup>2</sup> ) | Linear range (µg/mL) | LOD (µg/mL) | LOQ (µg/mL) | RSD Intra day (%) | RSD Inter day (%) |
|---------------------|----------------------------------------------|----------------------|-------------|-------------|-------------------|-------------------|
| Caffeic acid        | 0.990                                        | 1-100                | 0.33        | 1.0         | 8.0               | 18                |
| Catechin            | 0.998                                        | 3.5-111              | 0.33        | 1.0         | 0.9               | 5.7               |
| Gallic acid         | 0.997                                        | 1-100                | 0.33        | 1.0         | 9.3               | 22                |
| Epicatechin         | 0.998                                        | 3.5-111              | 0.33        | 1.0         | 1.5               | 8.3               |
| Protocatechuic acid | 0.993                                        | 1-100                | 0.33        | 1.0         | 7.0               | 15.7              |
| Rutin               | 0.990                                        | 3.5-111              | 0.17        | 0.50        | 4.0               | 16.5              |
| Taxifolin           | 0.997                                        | 1-100                | 0.83        | 2.50        | 6.0               | 17.3              |

LOD: limit of detection; LOQ: limit of quantification, RSD: relative standard deviation (n = 3)

**Supplementary Figure**

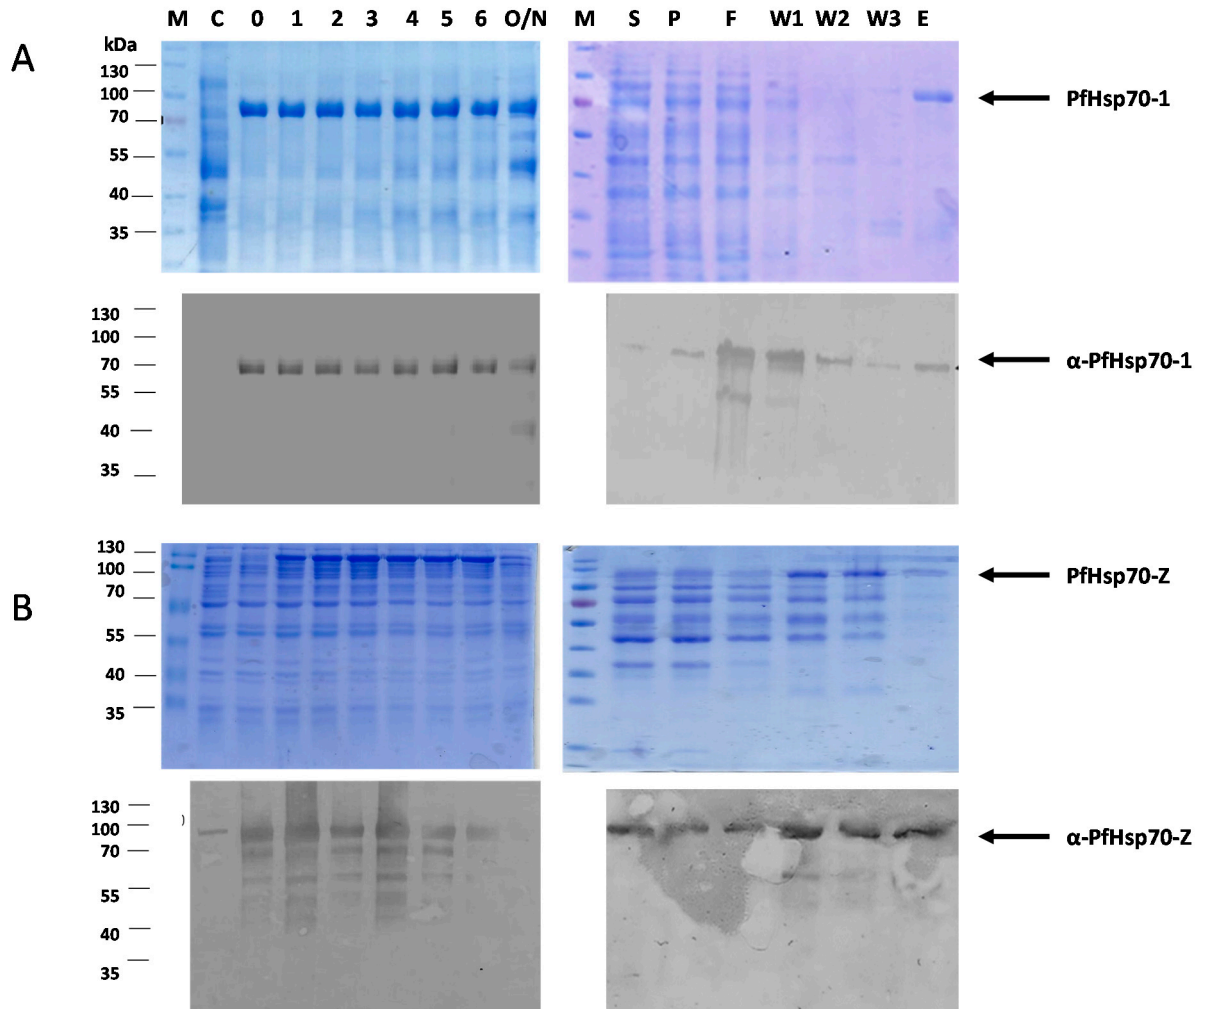

**Figure S1: Expression purification of recombinant PfHsp70-1 and PfHsp70-z.** (A) PfHsp70-1 was expressed in *E. coli* XL1 Blue cells transformed with pQE30/PfHsp70-1. SDS-PAGE (12 %) and Western analyses (lower panel) of the expression of recombinant PfHsp70-1, the purification of PfHsp70-1 as previously described [14]. (B) PfHsp70-z was expressed in *E. coli* JM109 cells transformed with pQE30/PfHsp70-z as previously described [11]. SDS-PAGE (12 %) and Western analyses (lower panel) of the expression and purification of recombinant PfHsp70-z, respectively. Lane M – Page ruler (Thermo Scientific) in kDa is shown on the left hand side; lane C - the total extract for cells transformed with a neat pQE30 plasmid; lane 0 – total cell extract transformed with pQE30/PfHsp70-1; pQE30/PfHsp70-z prior to IPTG induction; lanes 1 - 6, O/N – total cell lysate obtained 1 - 6 hours and overnight post induction. Lane P, S-pellet and soluble fractions obtained from the total lysate for cells transformed with pQE30/PfHsp70-1 or pQE30/PfHsp70-z, respectively; lane F; flow through; lane W – wash samples, and lane E – PfHsp70-z protein eluted using 500 mM imidazole. Lower panels: Western blot confirming expression, purification of PfHsp70-1 and PfHsp70-z based on using  $\alpha$ -PfHsp70-1 and  $\alpha$ -PfHsp70-z antibodies, respectively.
